# Supplementary material for: Design and control of Lewis acid sites in Sn-substituted microporous architectures
Source: Royal Society of Chemistry journal article supplement (doi:10.1039/c5ta10283a), 2016-01-01
Supplement: c5ta10283a1.pdf [file c5ta10283a1.pdf]

## Electronic Supplementary Information (ESI)

### Design and Control of Lewis Acid Sites in Sn-substituted Microporous Architectures

Khaled M. H. Mohammed,<sup>a,b,c†</sup> Arunabhiram Chutia,<sup>a,b</sup> June Callison,<sup>a,b</sup> Peter P. Wells,<sup>a,b</sup> Emma K. Gibson,<sup>a,b</sup> Andrew M. Beale,<sup>a,b</sup> C. Richard A. Catlow<sup>a,b</sup> and Robert Raja<sup>d†</sup>

<sup>a</sup> UK Catalysis Hub, Research Complex at Harwell (RCaH), Rutherford Appleton Laboratory, Harwell Oxon, OX11 0FA (UK).

<sup>b</sup> Department of Chemistry, University College London, 20 Gordon Street, London, WC1H 0AJ, UK.

<sup>c</sup> Chemistry Department, Faculty of Science, Sohag University, Sohag, P.O.B 82524, Egypt.

<sup>d</sup> School of Chemistry, University of Southampton, Southampton, SO17 1BJ (UK).

### Contents

|                                                     |   |
|-----------------------------------------------------|---|
| 1. Supporting Characterisations .....               | 2 |
| 1.1. TG-DTG .....                                   | 2 |
| 1.2. MAS NMR experimental conditions .....          | 2 |
| ▪ <sup>119</sup> Sn MAS NMR.....                    | 2 |
| ▪ <sup>31</sup> P and <sup>27</sup> Al MAS NMR..... | 2 |
| 1.3. DR UV/Vis spectroscopy .....                   | 2 |
| 1.4. BET surface area (S <sub>BET</sub> ):.....     | 3 |
| 2. Supporting results .....                         | 4 |
| 2.1. Template removal by calcination .....          | 4 |
| 2.2. TGA .....                                      | 4 |
| 2.3. Index of XRD patterns.....                     | 6 |
| 2.4. BET surface area (S <sub>BET</sub> ).....      | 9 |
| 3. References.....                                  | 9 |

## 1. Supporting Characterisations

### 1.1. TG-DTG

TGA-DTG analyses were collected using TA instruments, Q50 TGA model. Typically, ~10 mg of the as-synthesised sample was placed into a platinum pan and loaded to the instrument. Then, the weight% was recorded upon heating to 800 °C at 5 °C/min and in flow of 100 ml/min of compressed air (60% balanced in N<sub>2</sub>). In order to identify the species evolved by calcination, ~20 mg of each sample was charged into Catlab Microreactor module (Hiden analytical) with a MS detector. The sample was placed into a quartz tube on a bed of glass wall and heated up to 800 °C (5 °C/min) in flow of 10% O<sub>2</sub>/He. As a result, MS signals of masses 12, 17, 18 and 44 were recorded.

### 1.2. MAS NMR experimental conditions.

#### ▪ <sup>119</sup>Sn MAS NMR

- Pulse sequence: Hahn echo with rotor sequence of 90-  $\tau$ -180
- Spectrometer: Bruker Avance III HD
- Magnetic frequency: 400.177 MHz
- Relaxation delay: 2.0 s.

#### ▪ <sup>31</sup>P and <sup>27</sup>Al MAS NMR

- Pulse sequence: hpdec for <sup>31</sup>P and onepul for <sup>27</sup>Al
- Spectrometer: Bruker Avance III HD for <sup>31</sup>P and Varian VNMRS for <sup>27</sup>Al.
- Magnetic frequency: 161.99 MHz for <sup>31</sup>P and 104.199 MHz for <sup>27</sup>Al.
- Pulse duration: 4.40  $\mu$ s for <sup>31</sup>P and 1.0  $\mu$ s for <sup>27</sup>Al.
- Recycle delay: 10 s for <sup>31</sup>P and 0.2 s for <sup>27</sup>Al.

### 1.3. DR UV/Vis spectroscopy

UV/Vis DRS were collected using UV-Vis 2600 spectrometer with an integrated sphere. Typically, a portion of the calcined sample (*ex situ* calcined and stored in a desiccator under vacuum) was placed into the sample holder. The sample's surface was flattened prior to the measurement and then the %R was recorded as a function of wavelength in the range of 200–800 nm. The %R was then converted to the absorbance using the Kubelka-Munk function. Baseline was corrected by using blank BaSO<sub>4</sub> discs before the measurement. For the reduced samples, a portion of the calcined sample was placed and heated in tube furnace in flow of pure H<sub>2</sub> at 400 °C for 2 h, then cooled down to RT in the same atmosphere. The tube containing the sample was sealed well and transferred into a glove box for the preparation purpose (placed in a homemade PTFE sample holder, covered by a quartz window) prior to each measurement. To ensure more protection of the sample and hence reduce the probability of sample's re-oxidation, vacuum grease was used at the edges of the sample holder between the holder and the quartz window, then place into a zipped bag for transfer to the instrument.

**1.4. BET surface area ( $S_{\text{BET}}$ ):**

$S_{\text{BET}}$  was calculated using the BET equation using  $\text{N}_2$  Physisorption analysis at 77 K on Quantachrome, Quadrasorb evo model. Prior to the measurement, all samples were degassed for 12 h at 150 °C to 0.1 Pa.

## 2. Supporting results

### 2.1. Template removal by calcination

Calcination at 550 °C was given first trail, which is commonly used for removing the SDA (N,N-dicyclohexylmethyl amine) from AlPO-5 based materials. However, this temperature was not enough to completely remove the SDA as can be seen from **Fig. S1 A** below (gray/oily solid powder obtained). So calcination at 700 °C was used to remove the template (**Fig. S1 B**).

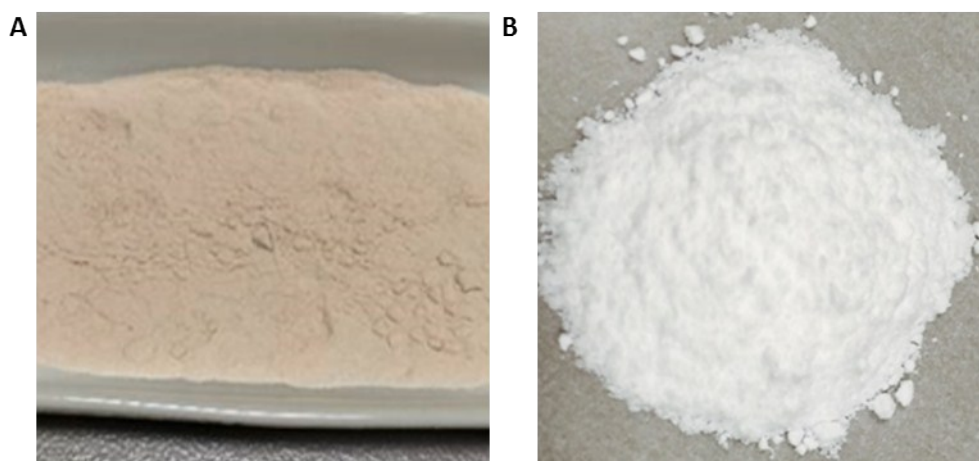

**Fig. S 1** The color of 3%Sn AlPO-5 sample after being calcined at **A)** 550 °C and **B)** 700 °C.

### 2.2. TGA

The removal of the organic template from the as-synthesised materials during their calcination in flow of compressed air as well as their thermal stabilities were studied using TG-DTG analysis. In addition, the evolved species were further traced using a MS detector by monitoring mass 12, 17, 18 and 44 while heating in flow of 10% O<sub>2</sub>/He in a distinct experiment. The results are presented in **Fig. S2** and **S3** below for 3%Sn and 6%CoSn AlPO-5 samples, respectively. The weight loss (%) in the temperature window of RT-150 °C is due to the desorption of physisorbed water. The removal of chemisorbed water and/or removal of organic SDA appear at 250–450 °C, while complete combustion of organic SDA residue appears between 500-700 °C. The results showed that the samples are thermally stable up to 800 °C. Based on this, the template was removed by the calcination at 700 °C (5 °C/min) in flow of compressed air.

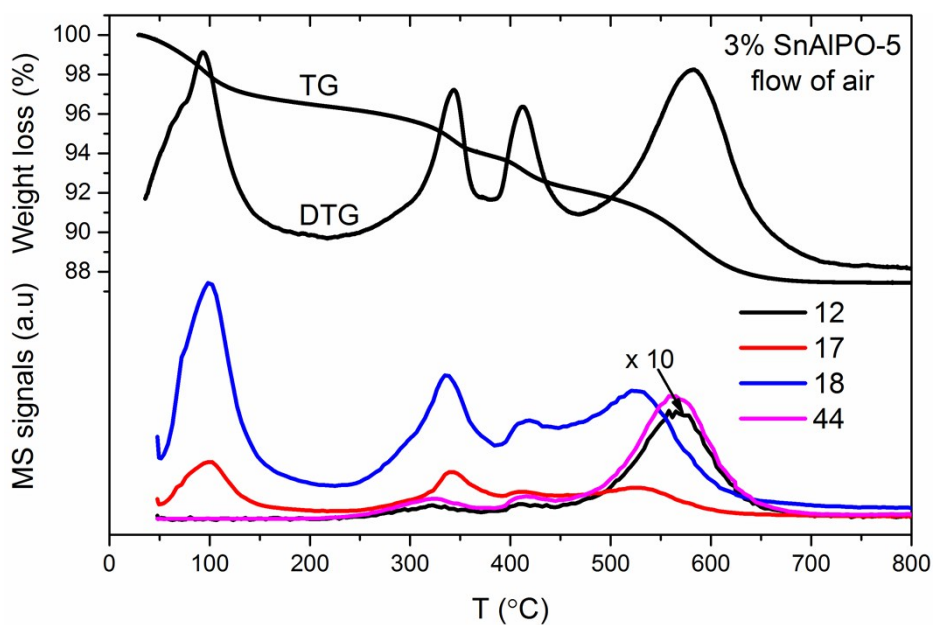

**Fig. S 2** TG-DTG (top) and MS signals (bottom) in flow of air while heating up (800 °C, 5 °C/min) for the as-synthesised 3% SnAlPO-5 sample, as indicated.

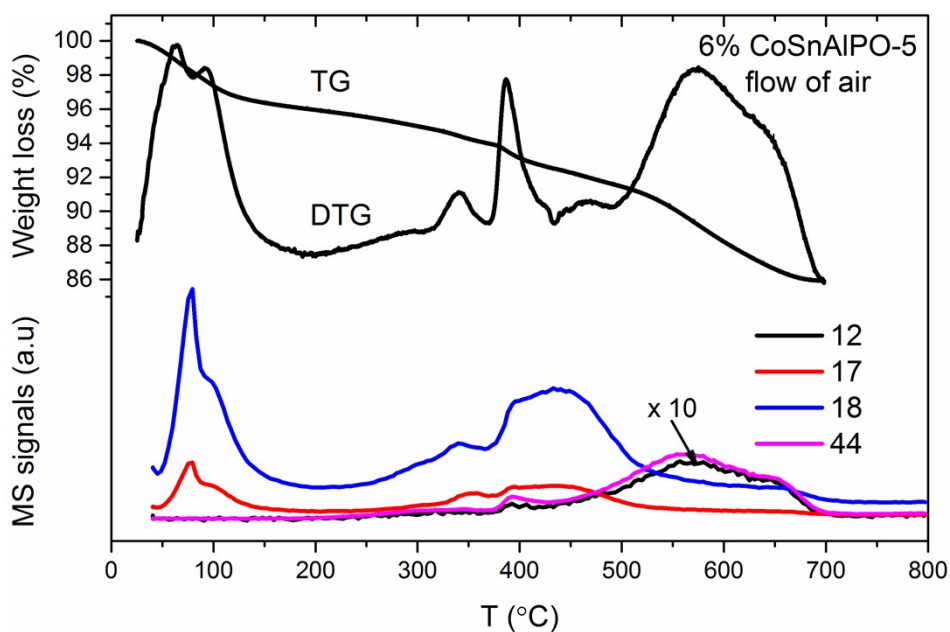

**Fig. S 3** TG-DTG (top) and MS signals (bottom) in flow of air while heating up (800 °C, 5 °C/min) for the as-synthesised 6% CoSnAlPO-5 sample, as indicated.

**2.3. Index of XRD patterns**

CELREF Version 3. 28/07/2015 10:57:55

**AlPO-5-700C sample**

Initial values : (Refinement keys on 2nd line)

| Zero | Lambda  | a       | b       | c      | alpha  | beta   | gamma   | Vol.   |
|------|---------|---------|---------|--------|--------|--------|---------|--------|
| 0.00 | 1.54060 | 13.7074 | 13.7074 | 8.3706 | 90.000 | 90.000 | 120.000 | 1362.1 |
| 0 0  | 1       | 0       | 1       | 0      | 0      | 0      |         |        |

Final values : (Standard errors on 2nd line)

| Zero | Lambda  | a       | b       | c      | alpha  | beta   | gamma   | Vol.   |
|------|---------|---------|---------|--------|--------|--------|---------|--------|
| 0.00 | 1.54060 | 13.7085 | 13.7085 | 8.3707 | 90.000 | 90.000 | 120.000 | 1362.3 |
| 0.00 | 0.00000 | 0.0143  | 0.0000  | 0.0012 | 0.000  | 0.000  |         |        |

  

| H | K | L | 2T(Obs) | 2T-Zero | 2Th(Cal) | Dif     |
|---|---|---|---------|---------|----------|---------|
| 0 | 1 | 0 | 7.4600  | 7.4600  | 7.4404   | 0.0196  |
| 1 | 1 | 0 | 12.9200 | 12.9200 | 12.9054  | 0.0146  |
| 0 | 2 | 0 | 14.9400 | 14.9400 | 14.9124  | 0.0276  |
| 1 | 2 | 0 | 19.7800 | 19.7800 | 19.7696  | 0.0104  |
| 0 | 0 | 2 | 21.2000 | 21.2000 | 21.2112  | -0.0112 |
| 1 | 2 | 1 | 22.4800 | 22.4800 | 22.4634  | 0.0166  |
| 1 | 1 | 2 | 24.9400 | 24.9400 | 24.9069  | 0.0331  |
| 2 | 2 | 0 | 25.9800 | 25.9800 | 25.9782  | 0.0018  |
| 1 | 2 | 2 | 29.1400 | 29.1400 | 29.1539  | -0.0139 |
| 0 | 4 | 0 | 30.0600 | 30.0600 | 30.0851  | -0.0251 |
| 2 | 2 | 2 | 33.7800 | 33.7800 | 33.7763  | 0.0037  |
| 1 | 4 | 0 | 34.5800 | 34.5800 | 34.5954  | -0.0154 |
| 0 | 4 | 2 | 37.0800 | 37.0800 | 37.1047  | -0.0247 |
| 1 | 2 | 3 | 37.9600 | 37.9600 | 37.9423  | 0.0177  |

CELREF Version 3. 15/04/2015 15:47:25

**3%Sn-700C sample**

Initial values : (Refinement keys on 2nd line)

| Zero | Lambda  | a       | b       | c      | alpha  | beta   | gamma   | Vol.   |
|------|---------|---------|---------|--------|--------|--------|---------|--------|
| 0.00 | 1.54060 | 13.7703 | 13.7703 | 8.3776 | 90.000 | 90.000 | 120.000 | 1375.7 |
| 0 0  | 1       | 0       | 1       | 0      | 0      | 0      |         |        |

Final values : (Standard errors on 2nd line)

| Zero | Lambda  | a       | b       | c      | alpha  | beta   | gamma   | Vol.   |
|------|---------|---------|---------|--------|--------|--------|---------|--------|
| 0.00 | 1.54060 | 13.7703 | 13.7703 | 8.3776 | 90.000 | 90.000 | 120.000 | 1375.7 |
| 0.00 | 0.00000 | 0.0258  | 0.0000  | 0.0027 | 0.000  | 0.000  |         |        |

| H | K | L | 2T(Obs) | 2T-Zero | 2Th(Cal) | Dif     |
|---|---|---|---------|---------|----------|---------|
| 0 | 1 | 0 | 7.3600  | 7.3600  | 7.4070   | -0.0470 |
| 1 | 1 | 0 | 12.8000 | 12.8000 | 12.8472  | -0.0472 |
| 0 | 2 | 0 | 14.8200 | 14.8200 | 14.8451  | -0.0251 |
| 1 | 2 | 0 | 19.6600 | 19.6600 | 19.6800  | -0.0200 |
| 0 | 0 | 2 | 21.1400 | 21.1400 | 21.1935  | -0.0535 |
| 0 | 3 | 0 | 22.3200 | 22.3200 | 22.3468  | -0.0268 |
| 2 | 2 | 0 | 25.8600 | 25.8600 | 25.8596  | 0.0004  |
| 1 | 2 | 2 | 29.0400 | 29.0400 | 29.0787  | -0.0387 |
| 0 | 4 | 0 | 29.9800 | 29.9800 | 29.9470  | 0.0330  |
| 2 | 2 | 2 | 33.7200 | 33.7200 | 33.6715  | 0.0485  |
| 2 | 3 | 1 | 34.4600 | 34.4600 | 34.4576  | 0.0024  |
| 0 | 4 | 2 | 37.0400 | 37.0400 | 36.9794  | 0.0606  |
| 1 | 2 | 3 | 37.8800 | 37.8800 | 37.8697  | 0.0103  |

---



---

CELREF Version 3. 15/04/2015 15:32:50

**6%CoSn-700C sample**

Initial values : (Refinement keys on 2nd line)

| Zero | Lambda  | a       | b       | c      | alpha  | beta   | gamma   | Vol.   |
|------|---------|---------|---------|--------|--------|--------|---------|--------|
| 0.00 | 1.54060 | 13.7623 | 13.7623 | 8.3631 | 90.000 | 90.000 | 120.000 | 1371.8 |
| 0    | 0       | 1       | 0       | 1      | 0      | 0      | 0       |        |

Final values : (Standard errors on 2nd line)

| Zero | Lambda  | a       | b       | c      | alpha  | beta   | gamma   | Vol.   |
|------|---------|---------|---------|--------|--------|--------|---------|--------|
| 0.00 | 1.54060 | 13.7626 | 13.7626 | 8.3631 | 90.000 | 90.000 | 120.000 | 1371.8 |
| 0.00 | 0.00000 | 0.0311  | 0.0000  | 0.0029 | 0.000  | 0.000  | 0.000   |        |

| H | K | L | 2T(Obs) | 2T-Zero | 2Th(Cal) | Dif     |
|---|---|---|---------|---------|----------|---------|
| 0 | 1 | 0 | 7.3800  | 7.3800  | 7.4111   | -0.0311 |
| 1 | 1 | 0 | 12.8400 | 12.8400 | 12.8545  | -0.0145 |
| 0 | 2 | 0 | 14.8400 | 14.8400 | 14.8535  | -0.0135 |
| 1 | 2 | 0 | 19.6600 | 19.6600 | 19.6911  | -0.0311 |
| 0 | 0 | 2 | 21.1400 | 21.1400 | 21.2305  | -0.0905 |
| 0 | 3 | 0 | 22.3400 | 22.3400 | 22.3595  | -0.0195 |
| 1 | 1 | 2 | 25.0000 | 25.0000 | 24.8965  | 0.1035  |
| 2 | 2 | 0 | 25.8600 | 25.8600 | 25.8743  | -0.0143 |
| 1 | 2 | 2 | 29.0800 | 29.0800 | 29.1139  | -0.0339 |
| 0 | 4 | 0 | 29.9800 | 29.9800 | 29.9642  | 0.0158  |
| 2 | 2 | 2 | 33.7200 | 33.7200 | 33.7072  | 0.0128  |
| 2 | 3 | 1 | 34.4800 | 34.4800 | 34.4815  | -0.0015 |
| 0 | 4 | 2 | 37.0800 | 37.0800 | 37.0158  | 0.0642  |
| 1 | 2 | 3 | 37.9000 | 37.9000 | 37.9248  | -0.0248 |

**Table S1: Cell parameters extracted from XRD analysis.**

| Sample      | Cell parameters (XRD) |       |
|-------------|-----------------------|-------|
|             | a (Å)                 | c (Å) |
| AlPO-5-700C | 13.71                 | 8.37  |
| 3%Sn-700C   | 13.77                 | 8.38  |
| 6%CoSn-700C | 13.76                 | 8.36  |

## 2.4. BET surface area ( $S_{\text{BET}}$ )

**Table S2:**  $S_{\text{BET}}$  ( $\text{m}^2\cdot\text{g}^{-1}$ ) values extracted from  $\text{N}_2$  Physisorption analysis.

| Sample      | $S_{\text{BET}}$ ( $\text{m}^2\cdot\text{g}^{-1}$ ) |
|-------------|-----------------------------------------------------|
| AlPO-5-700C | 345 ( $\pm 5$ )                                     |
| 3%Sn-700C   | 399 ( $\pm 5$ )                                     |
| 6%CoSn-700C | 168 ( $\pm 5$ )                                     |

## 3. References

- 1 M. E. Potter, a. J. Paterson and R. Raja, *ACS Catal.*, 2012, **2**, 2446–2451.
- 2 J. Paterson, M. Potter, E. Gianotti and R. Raja, *Chem. Commun. (Camb.)*, 2011, **47**, 517–519.
- 3 A. M. Beale, G. Sankar, C. R. A. Catlow, P. A. Anderson and T. L. Green, *Phys. Chem. Chem. Phys.*, 2005, **7**, 1856–1860.
- 4 B. Ravel, B. Ravel, M. Newville and M. Newville, *J. Synchrotron Radiat.*, 2005, **12**, 537–541.
- 5 M. E. Potter, D. Sun, E. Gianotti, M. Manzoli and R. Raja, *Phys. Chem. Chem. Phys.*, 2013, **15**, 13288–13295.
- 6 B. Delley, *J. Chem. Phys.*, 1990, **92**, 508.
- 7 B. Delley, *J. Chem. Phys.*, 2000, **113**, 7756.
- 8 J. P. Perdew and Y. Wang, *Phys. Rev. B*, 1992, **45**, 13244–13249.
